# Supplementary material
Source: Research Square preprint supplement (doi:10.21203/rs.3.rs-8920061/v1)
Supplement: Supplementary file 1 [file a82fe581c899c8534bb386ed.docx]

# STROBE Statement—Checklist of items that should be included in reports of cross-sectional studies

| Item | Recommendation | Page/Line |
| --- | --- | --- |
| Title and abstract | 1(a) Indicate the study’s design with a commonly used term in the title or the abstract | Title page, Abstract |
|  | 1(b) Provide in the abstract an informative and balanced summary of what was done and what was found | Abstract |
| Introduction - Background/rationale | 2 Explain the scientific background and rationale for the investigation being reported | p.3 |
| Introduction - Objectives | 3 State specific objectives, including any prespecified hypotheses | p.3, end of Introduction |
| Methods - Study design | 4 Present key elements of study design early in the paper | p.4 |
| Methods - Setting | 5 Describe the setting, locations, and relevant dates, including periods of recruitment, exposure, follow-up, and data collection | p.4 |
| Methods - Participants | 6(a) Give the eligibility criteria, and the sources and methods of selection of participants | p.4 |
|  | 6(b) For matched studies, give matching criteria and number of exposed and unexposed | N/A  Not applicable, as this was not a matched study |
| Methods - Variables | 7 Clearly define all outcomes, exposures, predictors, potential confounders, and effect modifiers. Give diagnostic criteria, if applicable | p.4-5 |
| Methods - Data sources/measurement | 8 For each variable of interest, give sources of data and details of methods of assessment (measurement). Describe comparability of assessment methods if there is more than one group | p.4-7 |
| Methods - Bias | 9 Describe any efforts to address potential sources of bias | p.5 |
| Methods - Study size | 10 Explain how the study size was arrived at | p.9 |
| Methods - Quantitative variables | 11 Explain how quantitative variables were handled in the analyses. If applicable, describe which groupings were chosen and why | p.6 |
| Methods - Statistical methods | 12(a) Describe all statistical methods, including those used to control for confounding | p.8-9 |
|  | 12(b) Describe any methods used to examine subgroups and interactions | p.8-9 |
|  | 12(c) Explain how missing data were addressed | There were no missing data in this study |
|  | 12(d) If applicable, describe analytical methods taking account of sampling strategy | N/A |
|  | 12(e) Describe any sensitivity analyses | N/A |
| Results - Participants | 13(a) Report numbers of individuals at each stage of study | Figure 1 + p.4-5 |
|  | 13(b) Give reasons for non-participation at each stage | Figure 1 + p.4-5 |
|  | 13(c) Consider use of a flow diagram | Figure 1 |
| Results - Descriptive data | 14(a) Give characteristics of study participants (demographic, clinical, social) and information on exposures and potential confounders | p.9-10 + Table 1 |
|  | 14(b) Indicate number of participants with missing data for each variable of interest | p.9 |
| Results - Outcome data | 15 Report numbers of outcome events or summary measures | p.9-11 + Tables 2–5 |
| Results - Main results | 16(a) Give unadjusted estimates and, if applicable, confounder-adjusted estimates and their precision | p.9-11 + Tables 2–5 |
|  | 16(b) Report category boundaries when continuous variables were categorized | All continuous variables were analyzed on their original scales; no categorization was applied. |
|  | 16(c) If relevant, consider translating estimates of relative risk into absolute risk | N/A |
| Results - Other analyses | 17 Report other analyses done—e.g., analyses of subgroups and interactions,  and sensitivity analyses | No subgroup, interaction, or sensitivity analyses were performed. |
| Discussion - Key results | 18 Summarise key results with reference to study objectives | p.11 |
| Discussion - Limitations | 19 Discuss limitations of the study, taking into account sources of potential bias or imprecision | p.14 |
| Discussion - Interpretation | 20 Give a cautious overall interpretation of results considering objectives, limitations, multiplicity of analyses, results from similar studies, and other relevant evidence | p.11-14 |
| Discussion - Generalisability | 21 Discuss the generalisability (external validity) of the study results | p.15 |
| Other information - Funding | 22 Give the source of funding and the role of the funders for the present study and, if applicable, for the original study on which the present article is based | Declarations section  p.15 |
